# Supplementary material
Source: Research Square preprint supplement (doi:10.21203/rs.3.rs-10048544/v1)
Supplement: Supplementary file 1 [file 810e21f0d945b1c3047b35d8.docx]

**Interview guideline**

| **Category** | **Questions** |
| --- | --- |
| Consent context and practices | 1. In your role, how are consent discussions for paediatric genomic testing or genomic research usually conducted? 2. In what contexts is consent sought — for example, clinical care, research projects, data sharing, or future research use? |
| Consent for future research use | 3. How is consent for future research use of genomic data or samples sought and recorded? 4. How do you explain “future research use” to parents, children, or adolescents? 5. Are there differences in how future research consent is handled in clinical care compared with research projects? |
| Data sharing and governance | 6. What kinds of concerns do families raise about future use or sharing of genomic data? |
| Parental authority and child involvement | 7. How are parents involved in making decisions about genomic testing and future research use? 8. How, if at all, are children involved in these discussions? 9. How do you approach adolescents’ developing capacity, preferences, or emerging autonomy? |
| Re-contact, re-affirmation, and re-consent | 10. In what circumstances would re-contact, re-affirmation, or re-consent be considered necessary or appropriate? 11. How is the transition to adulthood managed where genomic data or samples were collected during childhood? 12. What practical or ethical challenges arise in re-contacting families or young people? |
| Communication challenges and improvement strategies | 13. What challenges arise when explaining consent for future research use, data sharing, or re-contact? 14. What strategies, resources, or changes could improve consent communication and support for families? |
